# Supplementary material for: Climate and Soil Type Together Explain the Distribution of Microendemic Species in a Biodiversity Hotspot
Source: PubMed Central journal article supplement (PMC3867321; doi:10.1371/journal.pone.0080811), 2013-12-18
Supplement: pone.0080811.s002.pdf [file pone.0080811.s002.pdf]

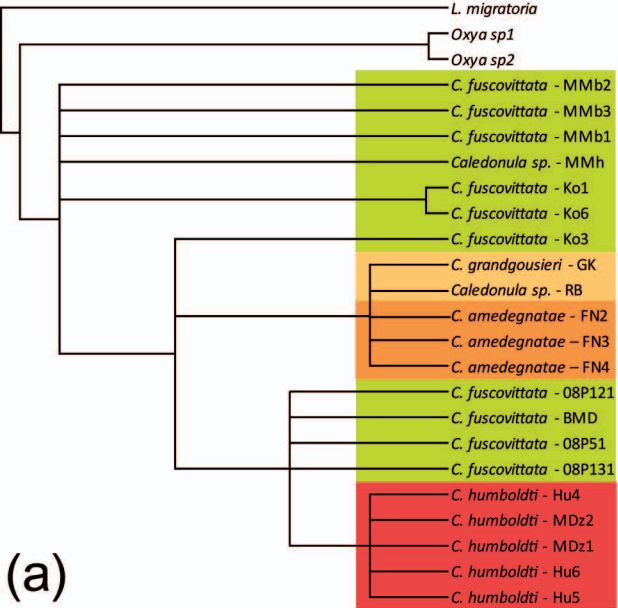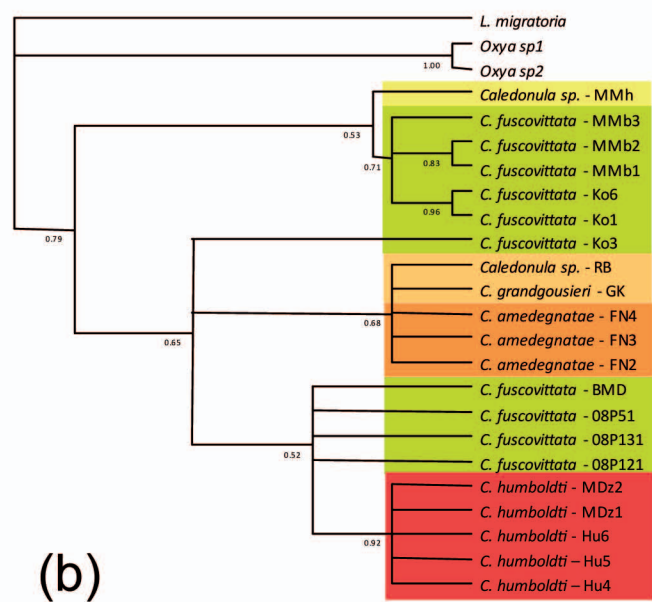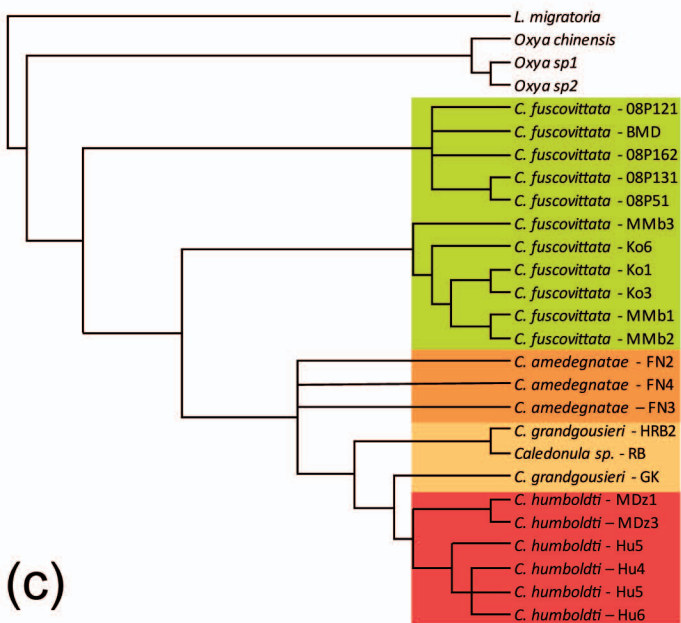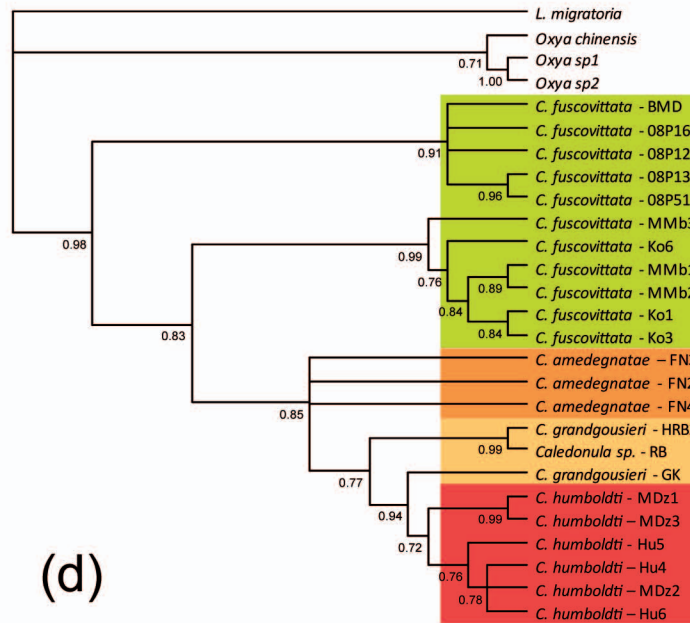

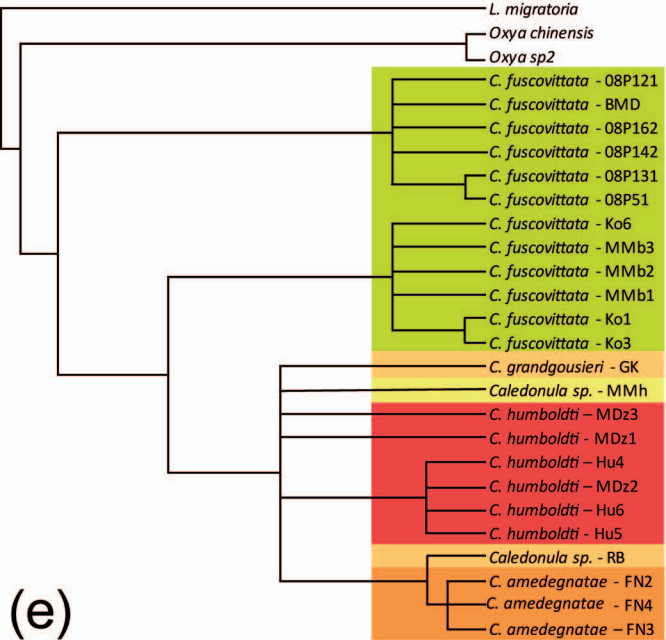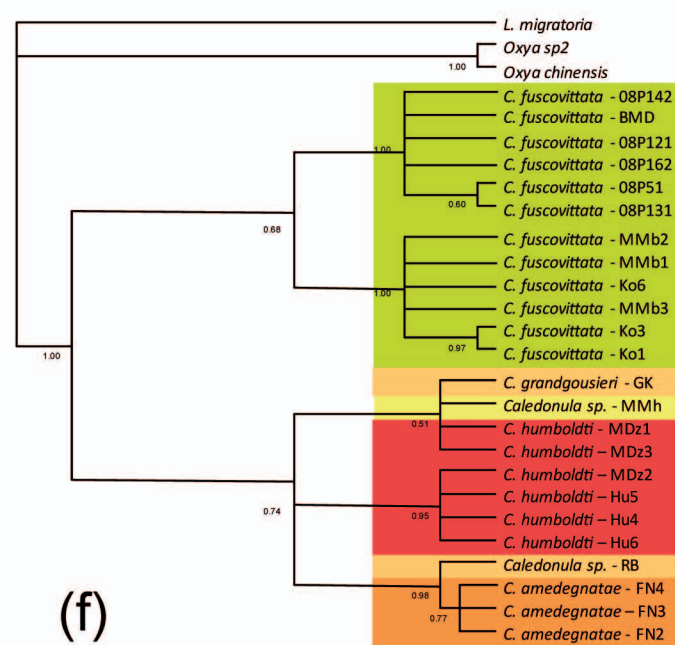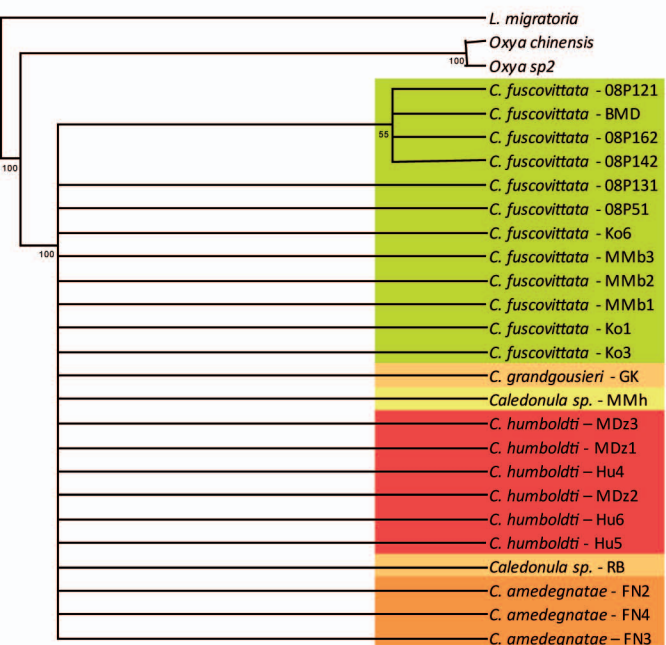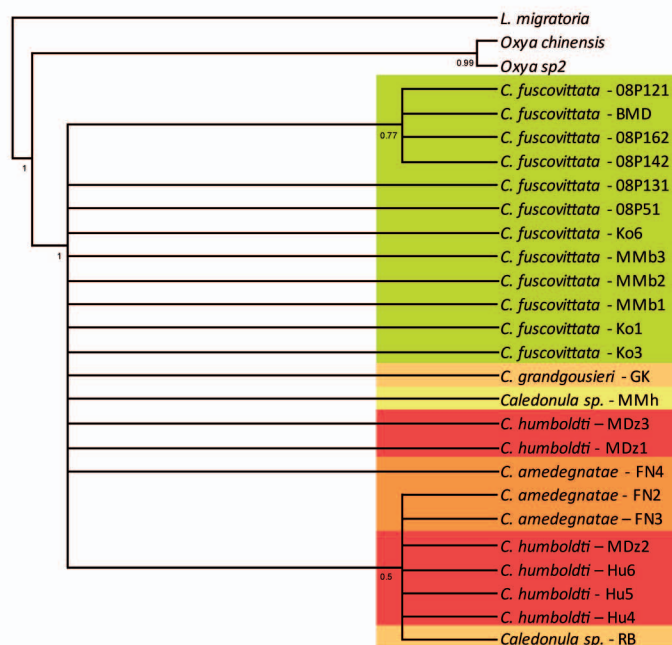

(g)

(h)
