# Supplementary material for: Climate and Soil Type Together Explain the Distribution of Microendemic Species in a Biodiversity Hotspot
Source: PubMed Central journal article supplement (PMC3867321; doi:10.1371/journal.pone.0080811), 2013-12-18
Supplement: pone.0080811.s003.pdf [file pone.0080811.s003.pdf]

| Species                          | Locality            | Sample code    | Voucher specimen       | GenBank accession number |          |          |
|----------------------------------|---------------------|----------------|------------------------|--------------------------|----------|----------|
|                                  |                     |                | MNHN collection number | CO1                      | ITS-1    | 28S      |
| <i>C. fuscovittata</i>           | Mts Koghis          | Ko1            | MNHN-CAELIF903         | KF772298                 | KF772415 | -        |
|                                  |                     | Ko3            | MNHN-CAELIF904         | KF772299                 | KF772416 | KF772294 |
|                                  |                     | Ko6            | MNHN-CAELIF905         | KF772300                 | KF772417 | -        |
|                                  | Col d'Amieu         | 08P121         | MNHN-CAELIF908         | -                        | KF772412 | -        |
|                                  |                     | 08P162         | MNHN-CAELIF910         | -                        | KF772414 | -        |
|                                  |                     | 08P51          | MNHN-CAELIF907         | KF772297                 | -        | -        |
|                                  |                     | 08P131         | MNHN-CAELIF909         | KF772296                 | KF772413 | -        |
|                                  |                     | 08P142         | MNHN-CAELIF906         | -                        | -        | -        |
|                                  | Mt Mou - bas        | MMb1           | MNHN-CAELIF900         | KF772301                 | KF772418 | -        |
|                                  |                     | MMb2           | MNHN-CAELIF901         | KF772302                 | KF772419 | -        |
| MMb3                             |                     | MNHN-CAELIF902 | KF772303               | -                        | -        |          |
| Base Mont Do                     | BMD                 | MNHN-CAELIF911 | -                      | -                        | -        |          |
| <i>C. humboldti n. sp.</i>       | Mts Dzumac          | MDz1           | MNHN-CAELIF924         | KF772310                 | -        | -        |
|                                  |                     | MDz2           | MNHN-CAELIF925         | KF772311                 | -        | -        |
|                                  |                     | MDz3           | MNHN-CAELIF934         | -                        | -        | -        |
|                                  | Mt Humboldt         | Hu4            | MNHN-CAELIF915         | -                        | KF772422 | -        |
|                                  |                     | Hu5            | MNHN-CAELIF916         | KF772308                 | -        | KF772295 |
|                                  |                     | Hu6            | MNHN-CAELIF919         | KF772309                 | -        | -        |
| <i>C. amedegnatae n. sp.</i>     | Foret Nord          | FN2            | MNHN-CAELIF928         | KF772304                 | KF772420 | -        |
|                                  |                     | FN3            | MNHN-CAELIF929         | KF772305                 | KF772421 | -        |
|                                  |                     | FN4            | MNHN-CAELIF933         | KF772306                 | -        | -        |
| <i>C. grandgousieri n. sp.</i>   | Mont Kouakoué       | GK             | MNHN-CAELIF913         | KF772307                 | -        | -        |
|                                  | Haute-Rivière bleue | HRB2           | MNHN-CAELIF912         | -                        | -        | -        |
| <i>Caledonula sp. (juvenile)</i> | Haut Mt Mou         | MMh            | MNHN-CAELIF935         | KF772312                 | -        | -        |
| <i>Caledonula sp. (juvenile)</i> | Haute-Rivière bleue | RB             | MNHN-CAELIF936         | KF772313                 | -        | -        |
| Oxyinae sp1                      | -                   | Oxsp1          | -                      | KF772314                 | -        | -        |
| Oxyinae sp2                      | -                   | Oxsp2          | -                      | KF772315                 | -        | -        |
| <i>Oxya chinensis</i>            | -                   | -              | -                      | NC_010219                | -        | EF685940 |
| <i>Locusta migratoria</i>        | -                   | -              | -                      | NC_001712                | -        | EF685941 |
